# Consumer Reactions to the Wisconsin Partnership Program and Its Parent, the Program for All-Inclusive Care of the Elderly (PACE)

Robert L. Kane, MD,<sup>1</sup> Patty Homyak, MHA,<sup>1</sup> and Boris Bershadsky, PhD<sup>1</sup>

**Purpose:** To compare enrollees in the Wisconsin Partnership Program (WPP), a Program for All-inclusive Care of the Elderly (PACE) variant designed to allow clients to use their regular primary care physician, with PACE enrollees in two programs operated by the two Wisconsin agencies.

**Design and Methods:** All enrollees in both programs were included in the sample. Enrollees were interviewed in person. Family members were interviewed by telephone. Questions compared disability levels and satisfaction. **Results:** The WPP clients were generally less disabled than the PACE enrollees. The levels of satisfaction among both clients and family members were essentially comparable. The use of advance directives was higher than in the general population but did not differ across the programs. **Implications:** WPP may be a valuable alternative to the rigid PACE approach, which may make enrollment difficult. However, a problem may lie in the limited participation of physicians. On average, the primary care physicians had only about six clients each. This level of involvement is insufficient to motivate them to change their practice patterns to accommodate this more comprehensive and integrated approach of care of frail older persons.

**Key Words:** Managed care, Dual eligibles, Elderly, Medicare, Medicaid

---

The Program for All-inclusive Care of the Elderly (PACE) stands as a model for integrating care for frail older persons (Branch, Coulam, & Zimmerman,

1995; Eleazer & Fretwell, 1999; Eng, Pedulla, Eleazer, McCann, & Fox, 1997; Kane, 1999). It was designed specifically to serve the dual-eligible population, those eligible for coverage under both Medicare and Medicaid. The frail elderly target population is defined by two criteria. They must be (a) dually eligible for both Medicare and Medicaid and (b) considered to be eligible for admission to a nursing home but living in the community at the time of enrollment. As with all dual-eligible managed-care programs, its intention is to pool the resources of the two funding programs in order to gain better integration and avoid duplications and conflicts from different rules for eligibility and coverage. In addition, the flexibility afforded by a single payment pool allows more creative uses of the money to cover whatever services are deemed necessary.

Developed originally to serve an elderly frail Chinese population in San Francisco, PACE has become a federally certified Medicare managed-care program. It was designed to serve a niche market, persons eligible for both Medicare and Medicaid who were deemed eligible for nursing home care but still lived in the community. As might be expected, this is a very small target group of high-risk persons whose capitation rate is substantial. About two thirds of the money comes from Medicaid, but the Medicare rate is a generous multiple (almost 2.5 times) of the base rate. This pool of resources allowed for the establishment of an integrated approach to care, which featured physicians working on salary and a clinical base in adult day health care. A central part of the model was the active inclusion of all those involved in any aspect of the enrollees' care as part of the core team, with regular team meetings and active information sharing. Innovative efforts were made to avoid the use of either acute or long-term care institutions. Creative means were found to tap all available resources to permit housing support from other means and to integrate care into that housing. Because the medical care is provided by PACE physicians, enrollees must forsake their regular providers in order to join. This provision has proved a deterrent to enrollment.

---

This article was prepared on the basis of work conducted under Health Care Financing Administration (HCFA) Contract 500-96-0008, Task Order 3. The opinions expressed are solely those of the authors and do not reflect those of the HCFA or the federal government. The HCFA is now the Centers for Medicare and Medicaid Services.

Address correspondence to Robert L. Kane, Division of Health Services Research and Policy, University of Minnesota School of Public Health, D351 Mayo (MMC 197), 420 Delaware Street SE, Minneapolis, MN 55455. E-mail: kanex001@umn.edu

<sup>1</sup>Division of Health Services Research and Policy, University of Minnesota School of Public Health, Minneapolis.

The evaluation of the original PACE demonstration project encountered logistical difficulties (Branch et al., 1995), but PACE did appear to have achieved its goal of reducing the use of institutions. Hospital days and admissions for PACE clients were lower than those for fee-for-service Medicare beneficiaries in general for the first 18 months of the evaluation, an impressive statistic when one considers the frailty of PACE clients. Likewise, PACE clients had fewer nursing home nights and admissions through the 1st year of the evaluation, but the difference dwindled over time. Perhaps commensurately, PACE clients had more ambulatory visits throughout the 24 months of the evaluation. Much less is known about the clinical outcomes of this care. There were few differences between PACE clients and controls in terms of functional status over time. Nor were there many patterns of differences in terms of self-rated health status, quality of life, or satisfaction (Chatterji, Burstein, Kidder, & White, 1998).

The hallmarks of PACE have been an emphasis on interdisciplinary teamwork, a reliance on the day care center as a base of operations, and a commitment to keeping clients out of institutions. PACE employs physicians to provide primary care to its clients and to work as part of the integrated care teams. Persons enrolling in PACE must agree to accept PACE physicians as their primary care providers. The dual requirements of heavy use of day care and limited choice of physician have proven to be obstacles to marketing PACE (Kane, Illston, & Miller, 1992).

The Wisconsin Partnership Program (WPP) is a PACE variation that attempts to address aspects of that approach that have made it difficult to market; namely, WPP allows enrollees to remain with their own primary care physician and to make substantially less use of day care. To achieve the same level of benefit from use of an interdisciplinary care team that has been a PACE hallmark, WPP created an interdisciplinary care management team composed of a nurse, social worker, and nurse practitioner. The latter has as a major part of his or her responsibility the task of coordinating closely with the primary care provider in order to bring him or her into the care planning and implementation loop. The level of delegation from primary care provider to nurse practitioner varies with the rapport developed.

Two of the four WPP sites, ElderCare in Madison (Dane County) and Community Care for the Elderly in Milwaukee, offer both PACE and WPP options. As part of the federally mandated evaluation of WPP, we had the opportunity to compare aspects of the care received by PACE and WPP enrollees. This article describes the results of the survey of WPP and PACE enrollees from those two sites in the areas of functioning and satisfaction with the care received.

## Methods

The study sample was limited to all WPP and PACE enrollees who were living in the community as of April 2000. Although both programs also cover

nursing home care, the number of enrollees in nursing homes made it impossible to achieve a sufficient sample size to include them. All enrollees were interviewed in person by trained interviewers whose interrater reliability had been established at the extensive training sessions. At the time of the interview, respondents were asked to identify a family member who had the closest caregiving relationship to them. This person was interviewed by phone. In the cases where the enrollee could not be interviewed, a proxy respondent was sought. The first choice for a proxy was a responsible family member who had enough contact with the beneficiary to provide valid answers. However, not all beneficiaries had family members who saw them regularly. For those who did not, a staff member was used as the proxy. These staff members were often caregivers in group homes or were care team members. Staff members were usually nurse practitioners, registered nurses, aides, case managers, or social workers. Staff members were not asked questions regarding patient satisfaction, quality of care, decision making, or unmet need.

The questionnaire was modeled after one used in a prior dual-eligible evaluation (Kane, Weiner, Homyak, & Bershadsky, 2001) but modified to emphasize elements the WPP staff felt were especially salient to their approach, namely attention to team care and respect for client autonomy. The survey instruments included demographic information; information regarding use of formal and informal care; satisfaction, including issues of access to services; advance medical directives; general health, functional status (activities of daily living [ADLs] and instrumental ADLs [IADL]); and informal caregiver burden (for family of community respondents). Wherever possible, previously tested measures were used. ADL items were derived from instruments developed by Finch and colleagues (Finch, Kane, & Philp, 1995). These questions focused on beneficiaries' ability to engage in basic daily activities (e.g., bathing, dressing, toileting, transferring, feeding, and walking). IADL items focused on the beneficiaries' ability to engage in a range of higher order daily activities from shopping to management of finances.

In addition to questions about ability to perform ADLs and IADLs, questions about unmet need for assistance with functional problems adapted from the work of Allen and Mor (1997) were used. For example, people who reported difficulties using the toilet were asked if they had needed help and did not receive it, if they had been wet or soiled because they did not receive this help, and if they had to wait more than 20 min before receiving help. To get at unmet need with regard to transferring, patients were asked if they had needed additional help getting in or out of a bed or chair and did not receive it and if they had fallen as a result of this lack of assistance. Satisfaction questions addressed receipt of services and the nature of the services they received (e.g., were services provided when needed, did personnel communicate effectively, did patients [or families] participate in decision making). Parallel versions of the satisfaction

items were used with enrollees and family respondents. The measure of burden was based on the Caregiver Reaction Assessment instrument developed by Given and colleagues (1992). Questions were asked about the extent to which advance directives were used and any pressures felt to adopt them.

Of the 392 elderly WPP enrollees identified, we were unable to locate 10, 24 had died, 3 had moved out of the area, 19 were living in a nursing home, 13 could not understand English and no proxy was available, another 2 had no proxy, 12 beneficiaries and 5 proxies refused interviews, and one interview was incomplete. Interviews were completed with 303 of 321 eligible enrollees or proxies (392 minus 71) for a response rate of 94%. Of these, 215 were beneficiaries, 82 were family proxies, and 6 were staff proxies. Among the 511 PACE enrollees targeted, 14 could not be located, 2 had moved out of the area, 57 had died, 92 had moved into nursing homes, 1 had no proxy, and 14 beneficiaries and 4 proxies refused interviews. Of the 326 interviews with the 345 persons eligible, 200 were with beneficiaries, 82 were with family proxies, and 44 were with proxies; the response rate was 94%.

Table 1. Characteristics of Sample

| Patient's Characteristics                                   | WPP<br>Elders<br>(N = 304) | PACE<br>Elders<br>(N = 322) | <i>p</i>  |
|-------------------------------------------------------------|----------------------------|-----------------------------|-----------|
| Female                                                      | 74                         | 82                          | .021      |
| Mean age                                                    | 77                         | 80                          | .000      |
| White                                                       | 64                         | 49                          | .000      |
| Latino                                                      | 5                          | 3                           | <i>ns</i> |
| Education beyond high school diploma                        | 25                         | 22                          | <i>ns</i> |
| Married                                                     | 26                         | 14                          | .000      |
| Self-rated health fair/poor <sup>a</sup>                    | 13                         | 9                           | <i>ns</i> |
| Mental status >3 errors <sup>a</sup>                        | 12                         | 17                          | <i>ns</i> |
| History of                                                  |                            |                             |           |
| Hypertension                                                | 66                         | 63                          | <i>ns</i> |
| Myocardial infarction                                       | 25                         | 20                          | <i>ns</i> |
| Coronary heart disease                                      | 18                         | 16                          | <i>ns</i> |
| Other heart disease                                         | 39                         | 25                          | .000      |
| Cancer (except skin)                                        | 14                         | 11                          | <i>ns</i> |
| Diabetes                                                    | 31                         | 33                          | <i>ns</i> |
| Mental retardation                                          | 2                          | 3                           | <i>ns</i> |
| Alzheimer's disease or dementia                             | 18                         | 29                          | .002      |
| Other mental health                                         | 11                         | 8                           | <i>ns</i> |
| Chronic obstructive pulmonary disease, asthma, or emphysema | 25                         | 16                          | .007      |
| Vision problems                                             | 61                         | 56                          | <i>ns</i> |
| Hearing loss                                                | 35                         | 34                          | <i>ns</i> |
| Stroke                                                      | 30                         | 33                          | <i>ns</i> |
| Parkinson's disease                                         | 3                          | 4                           | <i>ns</i> |
| Arthritis                                                   | 65                         | 64                          | <i>ns</i> |
| Hip fracture                                                | 10                         | 9                           | <i>ns</i> |
| Lost arm or leg                                             | 3                          | 2                           | <i>ns</i> |
| Neurological disorder                                       | 4                          | 2                           | <i>ns</i> |

Notes: Percentage of respondents and proxies unless otherwise indicated. WPP = Wisconsin Partnership Program; PACE = Program for All-inclusive Care of the Elderly.

<sup>a</sup>Based on patients' reports only.

## Results

The WPP sample differed from the PACE sample in a few demographic respects, as seen in Table 1. The PACE sample was more than 2 years older on average, was less likely to be married, and contained more people of color. PACE enrollees were more likely to suffer from dementia but were less likely to have other heart disease and chronic pulmonary disease.

As shown in Table 2, although there was no difference in the prevalence of pain or depression, the PACE sample was more disabled. They had significantly higher rates of dependency for all ADL measures, except walking. Likewise, they had significantly higher IADL dependency rates for all but one IADL category, using transportation.

Unmet needs were assessed by asking those respondents who reported dependency in a given area if they suffered untoward consequences because of lack of timely assistance with that problem. The pattern of responses is shown in Table 3. In general, the patterns were comparable. There were no significant differences.

The reported pattern of formal and informal service use differed across the groups. In general, this difference reflects the nature of the services provided. WPP used more care at home, and PACE relied on day care. As seen in Table 4, with regard to formal services, WPP respondents reported more nurse visits

Table 2. Evidence of Dependency and Discomfort

| Dependency/Discomfort                                                   | WPP<br>Elders<br>(N = 304) | PACE<br>Elders<br>(N = 326) | <i>p</i>  |
|-------------------------------------------------------------------------|----------------------------|-----------------------------|-----------|
| Pain/discomfort moderate/severe <sup>a</sup>                            | 49                         | 44                          | <i>ns</i> |
| If pain, interferes with normal activity some/most of time <sup>a</sup> | 59                         | 50                          | <i>ns</i> |
| Very satisfied with pain control <sup>a</sup>                           | 91                         | 91                          | <i>ns</i> |
| Depression > 5 on GDS <sup>a</sup>                                      | 18                         | 15                          | <i>ns</i> |
| Needs a little help or more with ADLs                                   |                            |                             |           |
| Bathing                                                                 | 44                         | 64                          | .000      |
| Dressing                                                                | 29                         | 47                          | .000      |
| Toileting                                                               | 15                         | 32                          | .000      |
| Transferring                                                            | 17                         | 28                          | .002      |
| Feeding                                                                 | 5                          | 15                          | .000      |
| Able to walk between rooms                                              | 84                         | 79                          | <i>ns</i> |
| Difficulty with IADLs                                                   |                            |                             |           |
| Shopping                                                                | 63                         | 74                          | .003      |
| Using phone                                                             | 28                         | 38                          | .014      |
| Doing light housework                                                   | 53                         | 67                          | .000      |
| Preparing meals                                                         | 59                         | 75                          | .000      |
| Using transportation                                                    | 35                         | 42                          | <i>ns</i> |
| Taking medications                                                      | 16                         | 26                          | .002      |
| Managing finances                                                       | 53                         | 75                          | .000      |
| Arranging services                                                      | 54                         | 73                          | .000      |

Notes: Percentage of respondents and proxies unless otherwise indicated. WPP = Wisconsin Partnership Program; PACE = Program for All-inclusive Care of the Elderly; GDS = Geriatric Depression Scale; ADLs = activities of daily living; IADLs = instrumental ADLs.

<sup>a</sup>Based on patients' reports only.

**Table 3. Ratio of Unmet Needs (Persons With Unmet Need/ Respondents With Dependency)**

| Unmet Needs                              | WPP Elders |        | PACE Elders |        |
|------------------------------------------|------------|--------|-------------|--------|
|                                          | %          | Rate   | %           | Rate   |
| Need help with bathing and did not get   | 9          | 12/133 | 8           | 17/209 |
| Not able to bathe                        | 15         | 20/133 | 15          | 32/209 |
| Need help with dressing and did not get  | 16         | 14/89  | 9           | 13/151 |
| Unable to put on clean clothes           | 10         | 9/89   | 5           | 7/151  |
| Need help with toileting and did not get | 10         | 2/20   | 27          | 7/26   |
| Wet or soiled because no help available  | 30         | 6/20   | 54          | 14/25  |
| Had to wait 20 min or more wet/soiled    | 19         | 9/47   | 18          | 14/76  |
| Need help transferring and did not get   | 17         | 9/53   | 11          | 10/91  |
| Fell because no help                     | 6          | 3/53   | 6           | 5/91   |
| Need help with eating and did not get    | 29         | 4/14   | 4           | 2/48   |
| Hungry because no help                   | 7          | 1/14   | 4           | 2/48   |
| Thirsty because no help                  | 14         | 2/14   | 6           | 3/48   |

Notes: All *ps* nonsignificant. Only respondents' self-reports are used. WPP = Wisconsin Partnership Program; PACE = Program for All-inclusive Care of the Elderly.

than did PACE, a finding consistent with the nature of the WPP service arrangement. Likewise, WPP beneficiaries used less day care and the special transportation associated with it. In a similar vein, they used less outpatient rehabilitation, a service provided at the day care centers. They also reported less speech therapy. Moreover, the WPP respondents used less infor-

mally provided help with dressing, toileting, and supervision than the PACE group.

Because both WPP and PACE are managed-care programs, there are subtle incentives to use less care or to avoid expensive, potentially futile care. As a result, one might expect that both sets of enrollees would be encouraged to complete advance directives. Table 5 compares the use of various types of advance medical directives. In general, the rate of advance directives was almost 50% for both groups. There was no difference in the content of these directives. Only one aspect of directive use showed a difference. More WPP enrollees reported that someone had suggested establishing an advance directive. Few in either group indicated any sense of being pressured to develop an advance directive.

Table 6 compares the level of satisfaction expressed for each of a series of elements for beneficiaries and families, respectively. The data are reported as unadjusted rates, but the statistical significance was calculated after adjusting for various attributes of the beneficiaries. For the beneficiary risk adjustment models, the variables used for risk adjustment included age (measured by years), race (measured by two dummy variables for Black and other races), education (measured by three dummy variables for high school diploma, some college, and college degree or above), marital status (measured by three dummy variables for widowed, separated or divorced, and never married), number of dependent ADLs, number of dependent IADLs, and number of medical conditions. For the family member risk adjustment models, the variables used for risk adjustment included beneficiary age, family member's age, gender, education, and race, number of beneficiary's IADL dependencies,

**Table 4. Formal/Informal Care for Community Samples**

| Formal/Informal Care                            | WPP Elders<br>(N = 303) | PACE Elders<br>(N = 325) | <i>p</i>  |
|-------------------------------------------------|-------------------------|--------------------------|-----------|
| Used homemaker in past 3 weeks                  | 53                      | 55                       | <i>ns</i> |
| Nurse visit in past 3 months                    | 77                      | 39                       | .000      |
| Used home-delivered meals in past 3 months      | 38                      | 41                       | <i>ns</i> |
| Used special transportation in past 3 months    | 76                      | 91                       | .000      |
| Used adult daycare in past 3 months             | 42                      | 81                       | .000      |
| Used outpatient rehabilitation in past 3 months | 24                      | 35                       | .003      |
| Received physical therapy in past 3 months      | 15                      | 18                       | <i>ns</i> |
| Received occupational therapy in past 3 months  | 5                       | 7                        | <i>ns</i> |
| Received speech therapy in past 3 months        | 1                       | 5                        | .002      |
| Other services                                  | 18                      | 9                        | .001      |
| Currently using medical equipment in the home   | 25                      | 24                       | <i>ns</i> |
| Own or rent medical equipment used in the home  |                         |                          |           |
| Own                                             | 17                      | 29                       | <i>ns</i> |
| Rent                                            | 55                      | 47                       | <i>ns</i> |
| Both rent and own                               | 5                       | 5                        | <i>ns</i> |
| Receive help from family or friends with        |                         |                          |           |
| Bathing                                         | 26                      | 31                       | <i>ns</i> |
| Dressing                                        | 25                      | 34                       | .022      |
| Toileting                                       | 42                      | 52                       | 0.01      |
| Transferring                                    | 15                      | 19                       | <i>ns</i> |
| Making sure patient is safe                     | 29                      | 37                       | .049      |

Notes: Percentage of respondents and proxies. WPP = Wisconsin Partnership Program; PACE = Program for All-inclusive Care of the Elderly.

**Table 5. Frequency of Advance Medical Directives (Percentage of Persons With Directive)**

|                                                                           | WPP Elders<br>(N = 278) | PACE Elders<br>(N = 285) | <i>p</i>  |
|---------------------------------------------------------------------------|-------------------------|--------------------------|-----------|
| Patient has put in writing . . .                                          |                         |                          |           |
| Advance medical directives established                                    | 47                      | 52                       | <i>ns</i> |
| Does not want cardiopulmonary resuscitation                               | 43                      | 46                       | <i>ns</i> |
| Does not want to be put on ventilator                                     | 46                      | 50                       | <i>ns</i> |
| Does not want tube feeding                                                | 39                      | 39                       | <i>ns</i> |
| Does not want to have infections treated                                  | 16                      | 14                       | <i>ns</i> |
| Does not want to be admitted to the hospital                              | 14                      | 11                       | <i>ns</i> |
| Does not want to have surgery                                             | 13                      | 14                       | <i>ns</i> |
| Anyone ever suggest establishing an advance medical directive to patient? | 62                      | 52                       | .015      |
| Patient felt pressured to establish an advance medical directive          | 8                       | 9                        | <i>ns</i> |
| Recommended directive                                                     |                         |                          |           |
| Patient physician                                                         | 34                      | 42                       | <i>ns</i> |
| Nurse                                                                     | 32                      | 25                       | <i>ns</i> |
| Care team                                                                 | 49                      | 24                       | .000      |
| Family members                                                            | 47                      | 51                       | <i>ns</i> |
| Religious leader                                                          | 3                       | 4                        | <i>ns</i> |
| Lawyer                                                                    | 4                       | 6                        | <i>ns</i> |

*Notes:* Percentage of respondents and proxies. WPP = Wisconsin Partnership Program; PACE = Program for All-inclusive Care of the Elderly.

**Table 6. Proportion of Beneficiaries and Family Members Responding Affirmatively to Satisfaction Items**

| Satisfaction Item                                                                                           | Beneficiaries (N = 391) |       |          | Family Members (N = 379) |       |          |
|-------------------------------------------------------------------------------------------------------------|-------------------------|-------|----------|--------------------------|-------|----------|
|                                                                                                             | PACE %                  | WPP % | <i>p</i> | PACE %                   | WPP % | <i>p</i> |
| You received PT, OT, or ST services when needed.                                                            | 96                      | 94    | .359     | 94                       | 89    | .059     |
| Hearing and eyesight checked regularly.                                                                     | 92                      | 88    | .258     | 93                       | 91    | .914     |
| Your doctor or other health professional responds quickly if you get sick.                                  | 93                      | 96    | .366     | 94                       | 96    | .774     |
| Your doctor or other health professional sees you often enough to treat your health problems.               | 96                      | 93    | .617     | 94                       | 95    | .762     |
| One person is clearly in charge of your medical care.                                                       | 79                      | 81    | .810     | 74                       | 68.4  | .907     |
| Your doctor or other health professional spends enough time with you.                                       | 89                      | 91    | .336     | 94                       | 91    | .147     |
| Your doctor or other health professional treats you with respect.                                           | 97                      | 99    | .275     |                          |       |          |
| Your doctor or other health professional explains your health problems.                                     | 91                      | 93    | .607     | 95                       | 93    | .400     |
| You are involved in making decisions about your medical care.                                               | 89                      | 86    | .361     | 82                       | 90    | .517     |
| Your doctor or other health professional is responsive to your health problems.                             | 96                      | 96    | .469     | 96                       | 97    | .544     |
| Your doctor or other health professional will hospitalize you when your health problems require it.         | 98                      | 99    | .482     | 98                       | 99    | .893     |
| Your doctor or other health professional knows how to manage your problems well.                            | 94                      | 97    | .128     | 95                       | 98    | .263     |
| Your doctor or other health professional is sensitive to your needs.                                        | 94                      | 97    | .280     | 96                       | 97    | .852     |
| You can see a specialist whenever you need to.                                                              | 93                      | 94    | .514     | 95                       | 95    | .895     |
| Services are available at times that fit well with your home and personal life.                             | 95                      | 97    | .193     | 97                       | 97    | .857     |
| It takes a great deal of your energy to get the health care services you need.                              | 26                      | 35    | .190     | 16                       | 18    | .573     |
| You have difficulty communicating with your doctor or health professional.                                  | 14                      | 19    | .581     | 12                       | 7     | .229     |
| Your doctor or other health professional does not take your needs and desires seriously.                    | 13                      | 12    | .422     | 8                        | 8     | .499     |
| Your care is not well coordinated.                                                                          | 29                      | 27    | .170     | 12                       | 13    | .972     |
| People who provide care for you seem to rely on you to provide information they should have for each other. | 31                      | 40    | .499     | 17                       | 34    | .000     |
| When decisions about your care are made, your priorities count.                                             | 93                      | 90    | .244     | 85                       | 86    | .465     |

*Notes:* For calculating the statistical significance of the beneficiary risk adjustment models, the variables used for risk adjustment included age (measured by years); race (measured by two dummy variables for Black and other races); education (measured by three dummy variables for high school diploma, some college, and college degree or above); marital status (measured by three dummy variables for widowed, separated or divorced, and never married); number of dependent activities of daily living (ADLs); number of dependent instrumental ADLs (IADLs); and number of medical conditions. For calculating the statistical significance of the family member risk adjustment models, the variables used for risk adjustment included beneficiary age, family member's age, gender, education, and race; number of beneficiary's IADL dependencies; number of beneficiary's ADL dependencies; and count of beneficiary's major medical diagnoses. WPP = Wisconsin Partnership Program; PACE = Program for All-inclusive Care of the Elderly.

number of beneficiary's ADL dependencies, and count of beneficiary's major medical diagnoses. None of the beneficiary satisfaction items showed a significant difference between WPP and PACE clients.

PACE family members were more likely to be female, non-White, and unmarried. There were no differences in the rate of contact with the beneficiaries. The only significant difference among family members' satisfaction after statistical adjustments were made addressed the issue of coordination within the care team. PACE families expressed less satisfaction than did WPP families. This difference was still significant after a Bonferroni correction was applied.

Table 7 displays the reports of caregiver burden among the two groups of families. Here again, the differences were modest. More PACE families felt they owed a great debt to their older relatives. They were less likely to feel they had enough physical strength to provide the care needed and that their health was adequate to the care tasks. However, these differences were not significant after a Bonferroni correction.

## Discussion

The PACE programs in the same geographic area seem to be caring for a more disabled group of clients than the WPP, including a higher rate of dementia. PACE clients were more likely to receive informal care, but there were only modest differences in the satisfaction reported by beneficiaries or their families. Nor was there a dramatic difference in care burden. The added informal care provided by PACE families was reflected in a few items on burden.

The patterns of service use reflect the differences in

program design. One area where the two programs differ substantially is their relationship to physicians. PACE hires physicians who work full time caring for enrolled patients, whereas WPP relies on a wide variety of primary care providers, most of whom care for only a few WPP clients each. However, the WPP program operated by the Milwaukee PACE site, one of the two compared here, has made a deliberate effort to concentrate its primary care load among a limited number of physicians. Limiting the choice of physician has generally been viewed as a marketing problem for PACE. However, the Milwaukee site has been able to do this with both PACE and WPP because it deals largely with a hospital clinic population that has not historically experienced continuity of care.

The findings suggest that coordination of care can be achieved in different ways, but it is probably better achieved if the participating physicians have enough of a stake in the care program to capture their attention and motivate them to alter their practice styles to address the complex needs of dual-eligible patients. The WPP program has taken steps to encourage more active participation by a more constrained panel of primary care doctors.

The two sites studied here face different market conditions. One site draws its clientele from poor people who rely heavily on university clinics, where there is an active turnover of physicians. Hence, these patients have no strong option for maintaining their continuity of care. Changing to a PACE physician is not a large transition. By contrast, the other site works largely with older individuals who have established relationships with local physicians and are less inclined to disrupt them. Not surprisingly,

Table 7. Rate of Caregiver Burden Among Families

| Caregiver Burden                                                 | WPP<br>(N = 179) | PACE<br>(N = 177) | p    |
|------------------------------------------------------------------|------------------|-------------------|------|
| Family feels privileged to care for patient.                     | 95               | 94                | ns   |
| Others have dumped caring for patient.                           | 35               | 39                | ns   |
| Family finds financial resources adequate to pay for caregiving. | 45               | 43                | ns   |
| Family activities centered around care.                          | 55               | 64                | ns   |
| Family tired all the time since caring for patient.              | 32               | 42                | ns   |
| Difficulty in getting help from other family.                    | 42               | 41                | ns   |
| Family resents taking care of patient.                           | 7                | 6                 | ns   |
| Family stops in the middle of work to care for patient.          | 34               | 35                | ns   |
| Family really wants to care for patient.                         | 97               | 98                | ns   |
| Family feels health worse since caregiving for patient.          | 24               | 28                | ns   |
| Family visits friends and family less.                           | 33               | 37                | ns   |
| Family feels can never do enough caregiving to repay patient.    | 67               | 78                | .050 |
| Family works together at caring for patient.                     | 66               | 65                | ns   |
| Family eliminated things from schedule since caring for patient. | 48               | 53                | ns   |
| Enough physical strength to care for patient.                    | 83               | 73                | .026 |
| Since caring for patient family has abandoned me.                | 13               | 17                | ns   |
| Caring for patient makes family feel good.                       | 98               | 98                | ns   |
| Interruptions make it difficult to relax.                        | 35               | 38                | ns   |
| Family is healthy enough to care for patient.                    | 90               | 81                | .014 |
| Family finds caring for patient important.                       | 99               | 99                | ns   |
| Caring has put financial strain on family.                       | 22               | 18                | ns   |
| Family left me alone to care for patient.                        | 33               | 40                | ns   |
| Enjoy caring for patient.                                        | 96               | 98                | ns   |
| It is difficult to pay for patient's needs and services.         | 28               | 31                | ns   |

Note: WPP = Wisconsin Partnership Program; PACE = Program for All-inclusive Care of the Elderly.

since the time of the study the two sites have gone in different directions. The Milwaukee site has kept both its PACE and WPP options operational, whereas the Madison site has merged all its services into the WPP option, which has proven easier to market. Even the continuing PACE site has changed its approach. For example, not all PACE users use the day care program.

Patient reports of satisfaction are often skewed positively (Hall, Feldstein, Fretwell, & Rowe, 1990; Owens & Batchelor, 1996; Stump, Dexter, Tierney, & Wolinsky, 1995). The responses reported here show more variation. Although the level of satisfaction with care is generally high for both groups, there are several areas with room for improvement. For example, a considerable proportion of respondents from both programs indicated dissatisfaction with the energy needed to get care, the coordination of that care, and communication with the health team. The family members identified problems with pain control, interaction with the team, coordination of care, and their overall rating of the medical care provided. The reports of satisfaction with pain control may well reflect some satisfaction bias among enrollees. Although a considerable number reported fairly active pain, most said they were satisfied with the level of pain control they experienced.

Although the proportion of clients with advance directives in both forms of managed care was considerably higher than average (both around 50%; DeLuca Havens, 2000; Gordin & Shade, 1999), there was no indication of any coercion to execute an advance directive from either plan. As part of their overall care management planning, representatives of both approaches were encouraged to offer advance directives to clients, but the recommendations were apparently low key.

The findings reported here are best interpreted in the context of a second study that compares the WPP experience to matched controls. That study found few differences (Kane, Homyak, & Bershadsky, in press). The prevalence of ADL and IADL dependency was lower for the WPP sample than for the PACE sample, but the extent of unmet needs was generally comparable. Overall, there were few areas of significant difference in beneficiaries' satisfaction. The WPP families were more satisfied than either control group that services were provided when needed and were better coordinated. There were no significant differences in the prevalence of any aspect of care burden. Although managed care seems potentially well suited as a vehicle to implement many of the goals of geriatric care, the overall results to date have been disappointing (Boult, Kane, & Brown, 2000; Kane, 1998).

Although PACE is widely cited as a model of well-integrated care, its effectiveness remains to be established. WPP may be a more marketable version of the PACE principles, but its effectiveness has not yet been demonstrated. It is important to recognize that WPP is still evolving as a program. It is trying to learn from its early experience to adapt its approaches as problems are uncovered.

## References

- Allen, S., & Mor, V. (1997). The prevalence and consequences of unmet need. *Medical Care*, 35(11), 1132-1148.
- Boult, C., Kane, R. L., & Brown, R. (2000). Managed care of chronically ill older people: The US experience. *British Medical Journal*, 321, 1011-1014.
- Branch, L. G., Coulam, R. F., & Zimmerman, Y. A. (1995). The PACE evaluation: Initial findings. *The Gerontologist*, 35, 349-359.
- Chatterji, P., Burstein, N. R., Kidder, D., & White, A. J. (1998). *Evaluation of the Program of All-Inclusive Care for the Elderly (PACE)*. Cambridge, MA: Abt Associates.
- DeLuca Havens, G. A. (2000). Differences in the execution/nonexecution of advance directives by community dwelling adults. *Research in Nursing & Health*, 23(4), 319-333.
- Eleazer, P., & Fretwell, M. (1999). The PACE model: A review. In P. Katz, R. L. Kane, & M. Mezey (Eds.), *Emerging systems in long-term care* (Vol. 4, pp. 88-117). New York: Springer Publishing.
- Eng, C., Pedulla, J., Eleazer, G. P., McCann, R., & Fox, N. (1997). Program of All-inclusive Care for the Elderly (PACE): An innovative model of integrated geriatric care and financing. *Journal of the American Geriatrics Society*, 45, 223-232.
- Finch, M., Kane, R. L., & Philp, I. (1995). Developing a new metric for ADLs. *Journal of the American Geriatrics Society*, 43, 877-884.
- Given, C. W., Given, B., Stommel, M., Collins, C., King, S., & Franklin, S. (1992). The Caregiver Reaction Assessment (CRA) for caregivers to persons with chronic physical and mental impairments. *Research in Nursing and Health*, 15, 271-283.
- Gordin, N. P., & Shade, S. B. (1999). Advance directives are more likely among seniors asked about end-of-life care preferences. *Archives of Internal Medicine*, 159(7), 701-704.
- Hall, J. A., Feldstein, M., Fretwell, M. D., & Rowe, J. W. (1990). Older patients' health status and satisfaction with medical care in an HMO population. *Medical Care*, 28(3), 261-270.
- Kane, R. L. (1998). Managed care as a vehicle for delivering more effective chronic care for older persons. *Journal of the American Geriatrics Society*, 46, 1034-1039.
- Kane, R. L. (1999). Setting the PACE in chronic care. *Contemporary Gerontology*, 6(2), 47-50.
- Kane, R. L., Homyak, P., & Bershadsky, B. (in press). Consumer responses to the Wisconsin Partnership Program for elderly persons: A variation on the PACE model. *Journal of the American Geriatrics Society*.
- Kane, R. L., Illston, L. H., & Miller, N. A. (1992). Qualitative analysis of the Program of All-inclusive Care for the Elderly (PACE). *The Gerontologist*, 32, 771-780.
- Kane, R. L., Weiner, A., Homyak, P., & Bershadsky, B. (2001). The Minnesota Senior Health Options program: An early effort at integrating care for the dually eligible. *Journal of Gerontology: Medical Sciences*, 56A, M559-M566.
- Owens, D. J., & Batchelor, C. (1996). Patient satisfaction and the elderly. *Social Science & Medicine*, 42(11), 1483-1491.
- Stump, T. E., Dexter, P. R., Tierney, W. M., & Wolinsky, F. D. (1995). Measuring patient satisfaction with physicians among older and diseased adults in a primary care municipal outpatient setting: An examination of three instruments. *Medical Care*, 33(9), 958-972.

Received July 26, 2001

Accepted October 31, 2001

Decision Editor: Laurence G. Branch, PhD
